# Supplementary material for: Solvent-free ketalization of polyols over germanosilicate zeolites: the role of the nature and strength of acid sites
Source: Royal Society of Chemistry journal article supplement (doi:10.1039/d0cy01662d), 2020-01-01

Supporting information:

S1: <sup>1</sup>H-<sup>13</sup>C NMR of reaction product (figure 8)

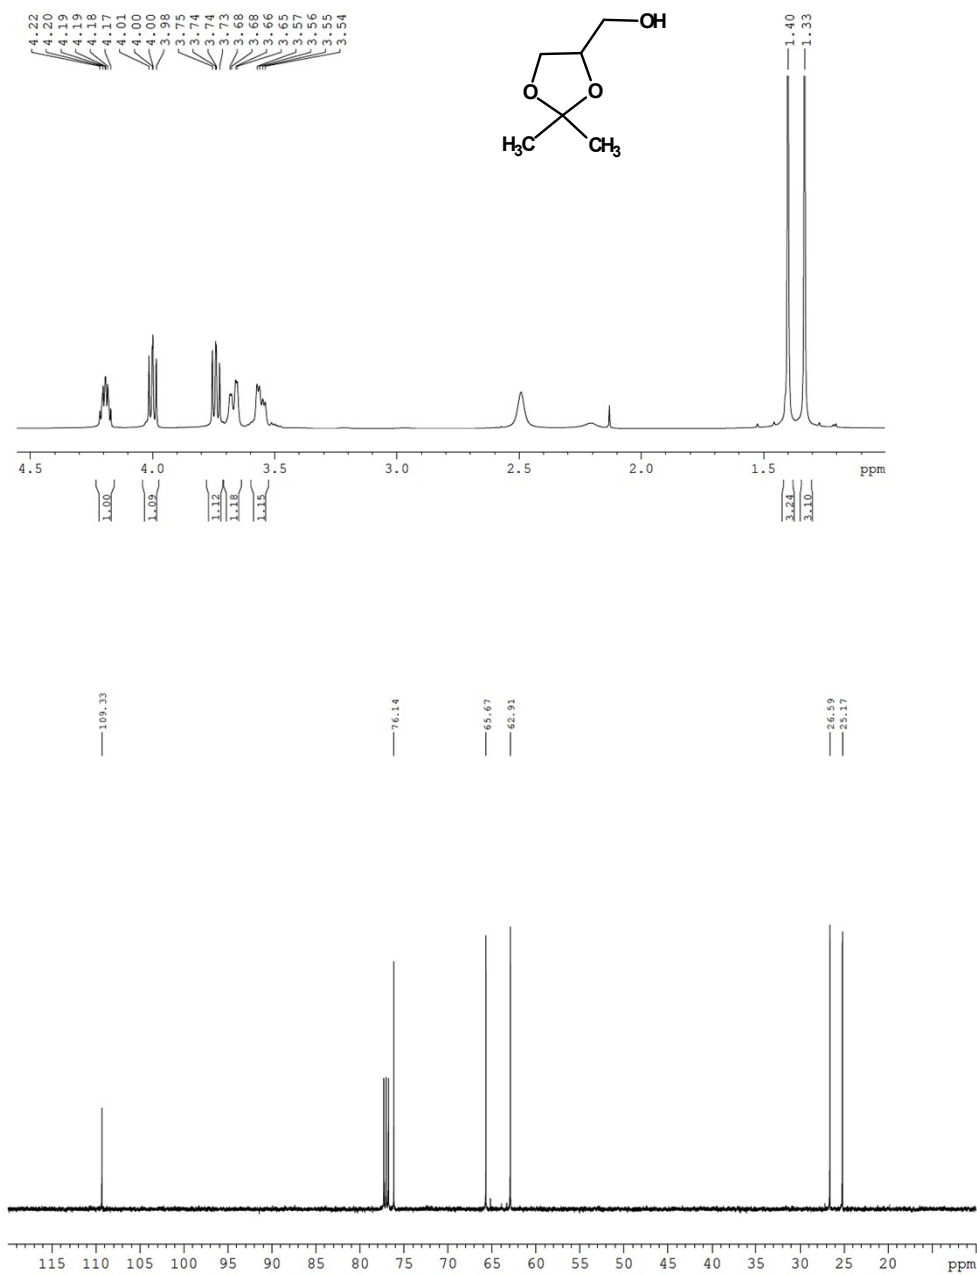

S2: FTIR spectra of IWW zeolite subjected to dose-by-dose adsorption of water, followed by saturation with pyridine

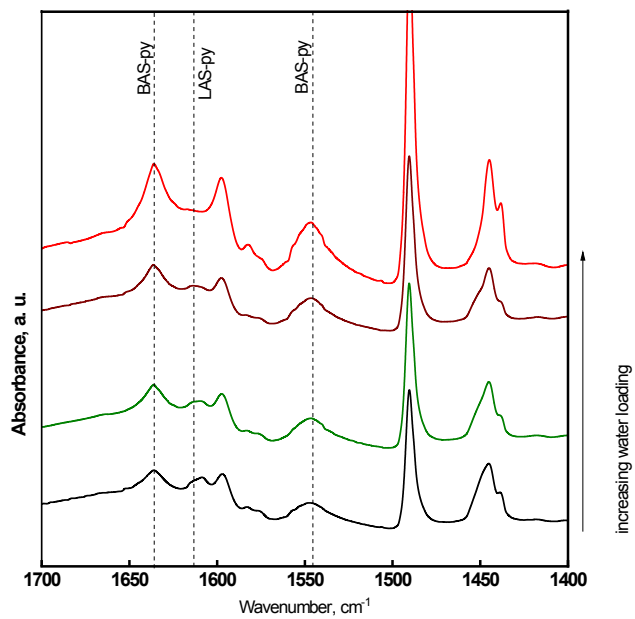

**S3: Variation of conversion with minimal molecule size of different products.**

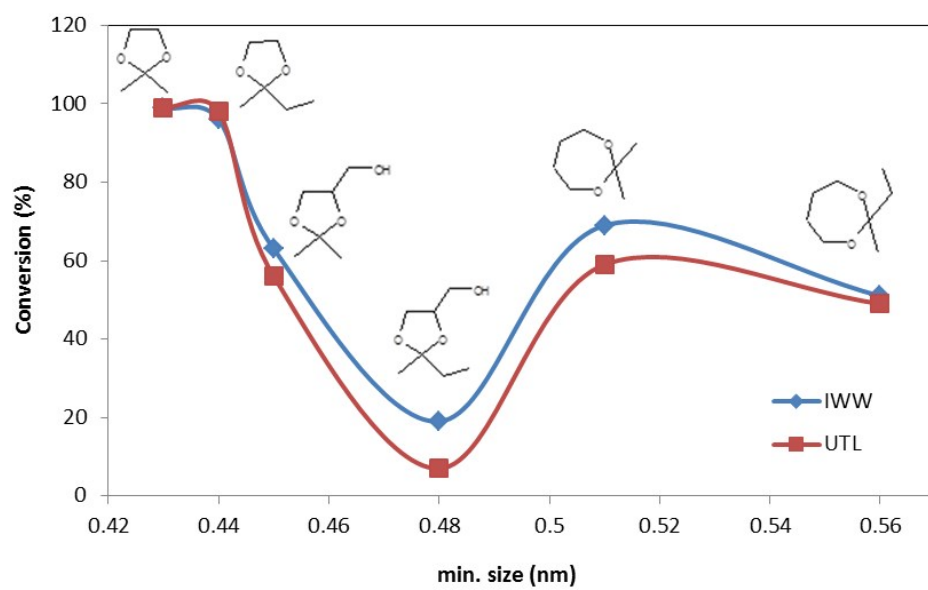

Supplement: d0cy01662d1.pdf [file d0cy01662d1.pdf]
